# Supplementary material for: Phage cocktail containing Podoviridae and Myoviridae bacteriophages inhibits the growth of Pectobacterium spp. under in vitro and in vivo conditions
Source: PubMed Central journal article supplement (PMC7117878; doi:10.1371/journal.pone.0230842), 2020-04-02

**A**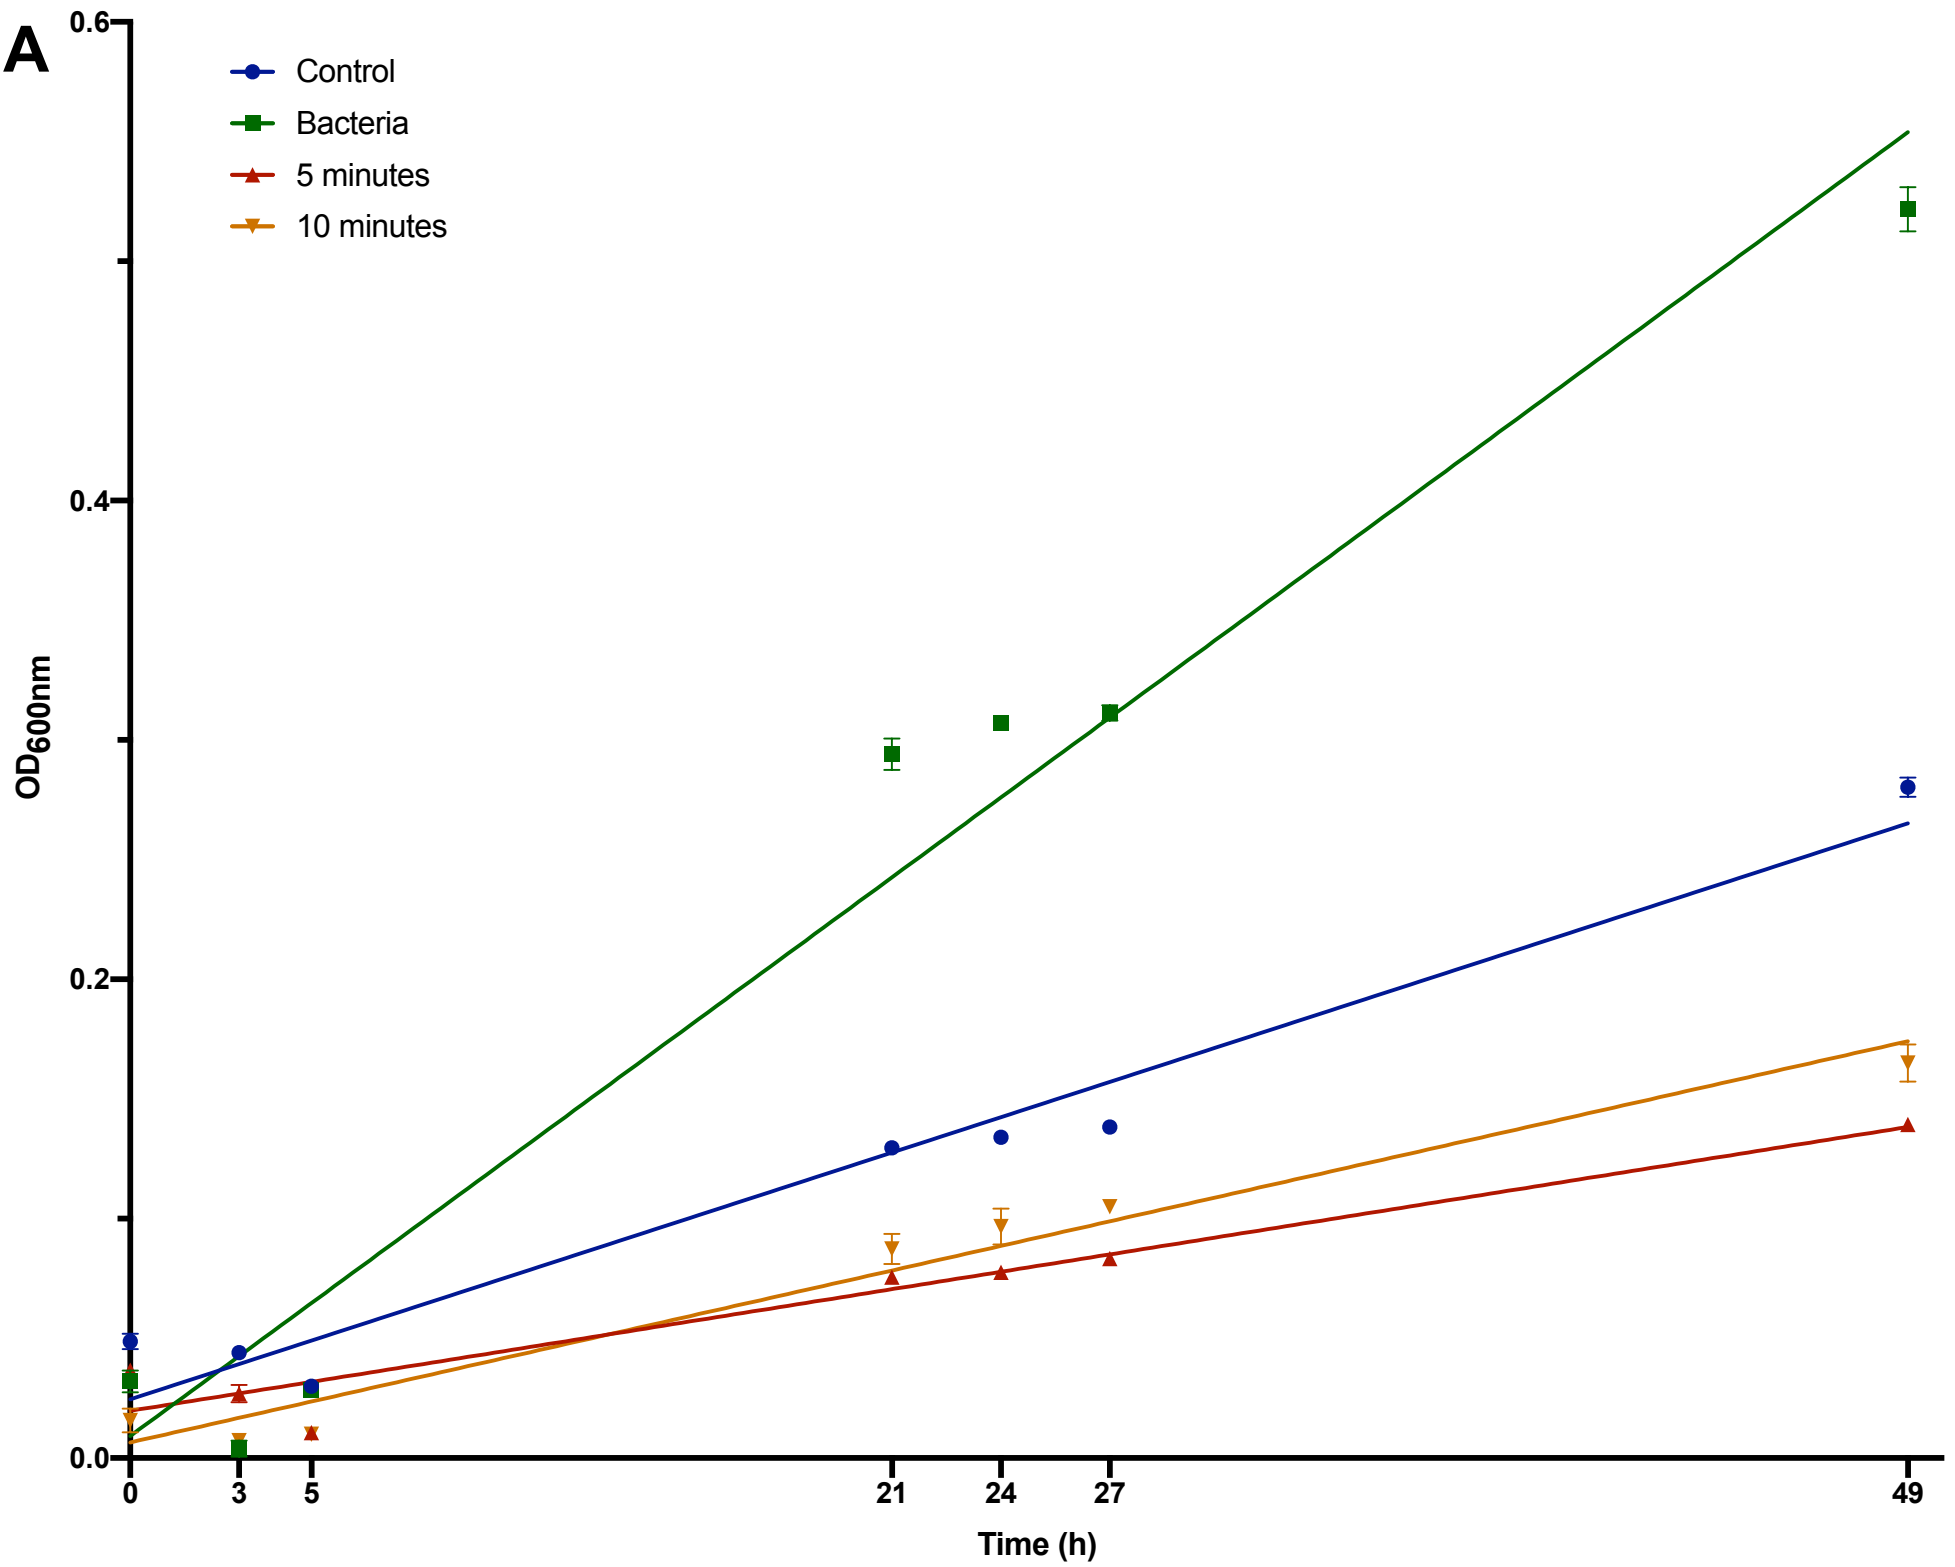

**B**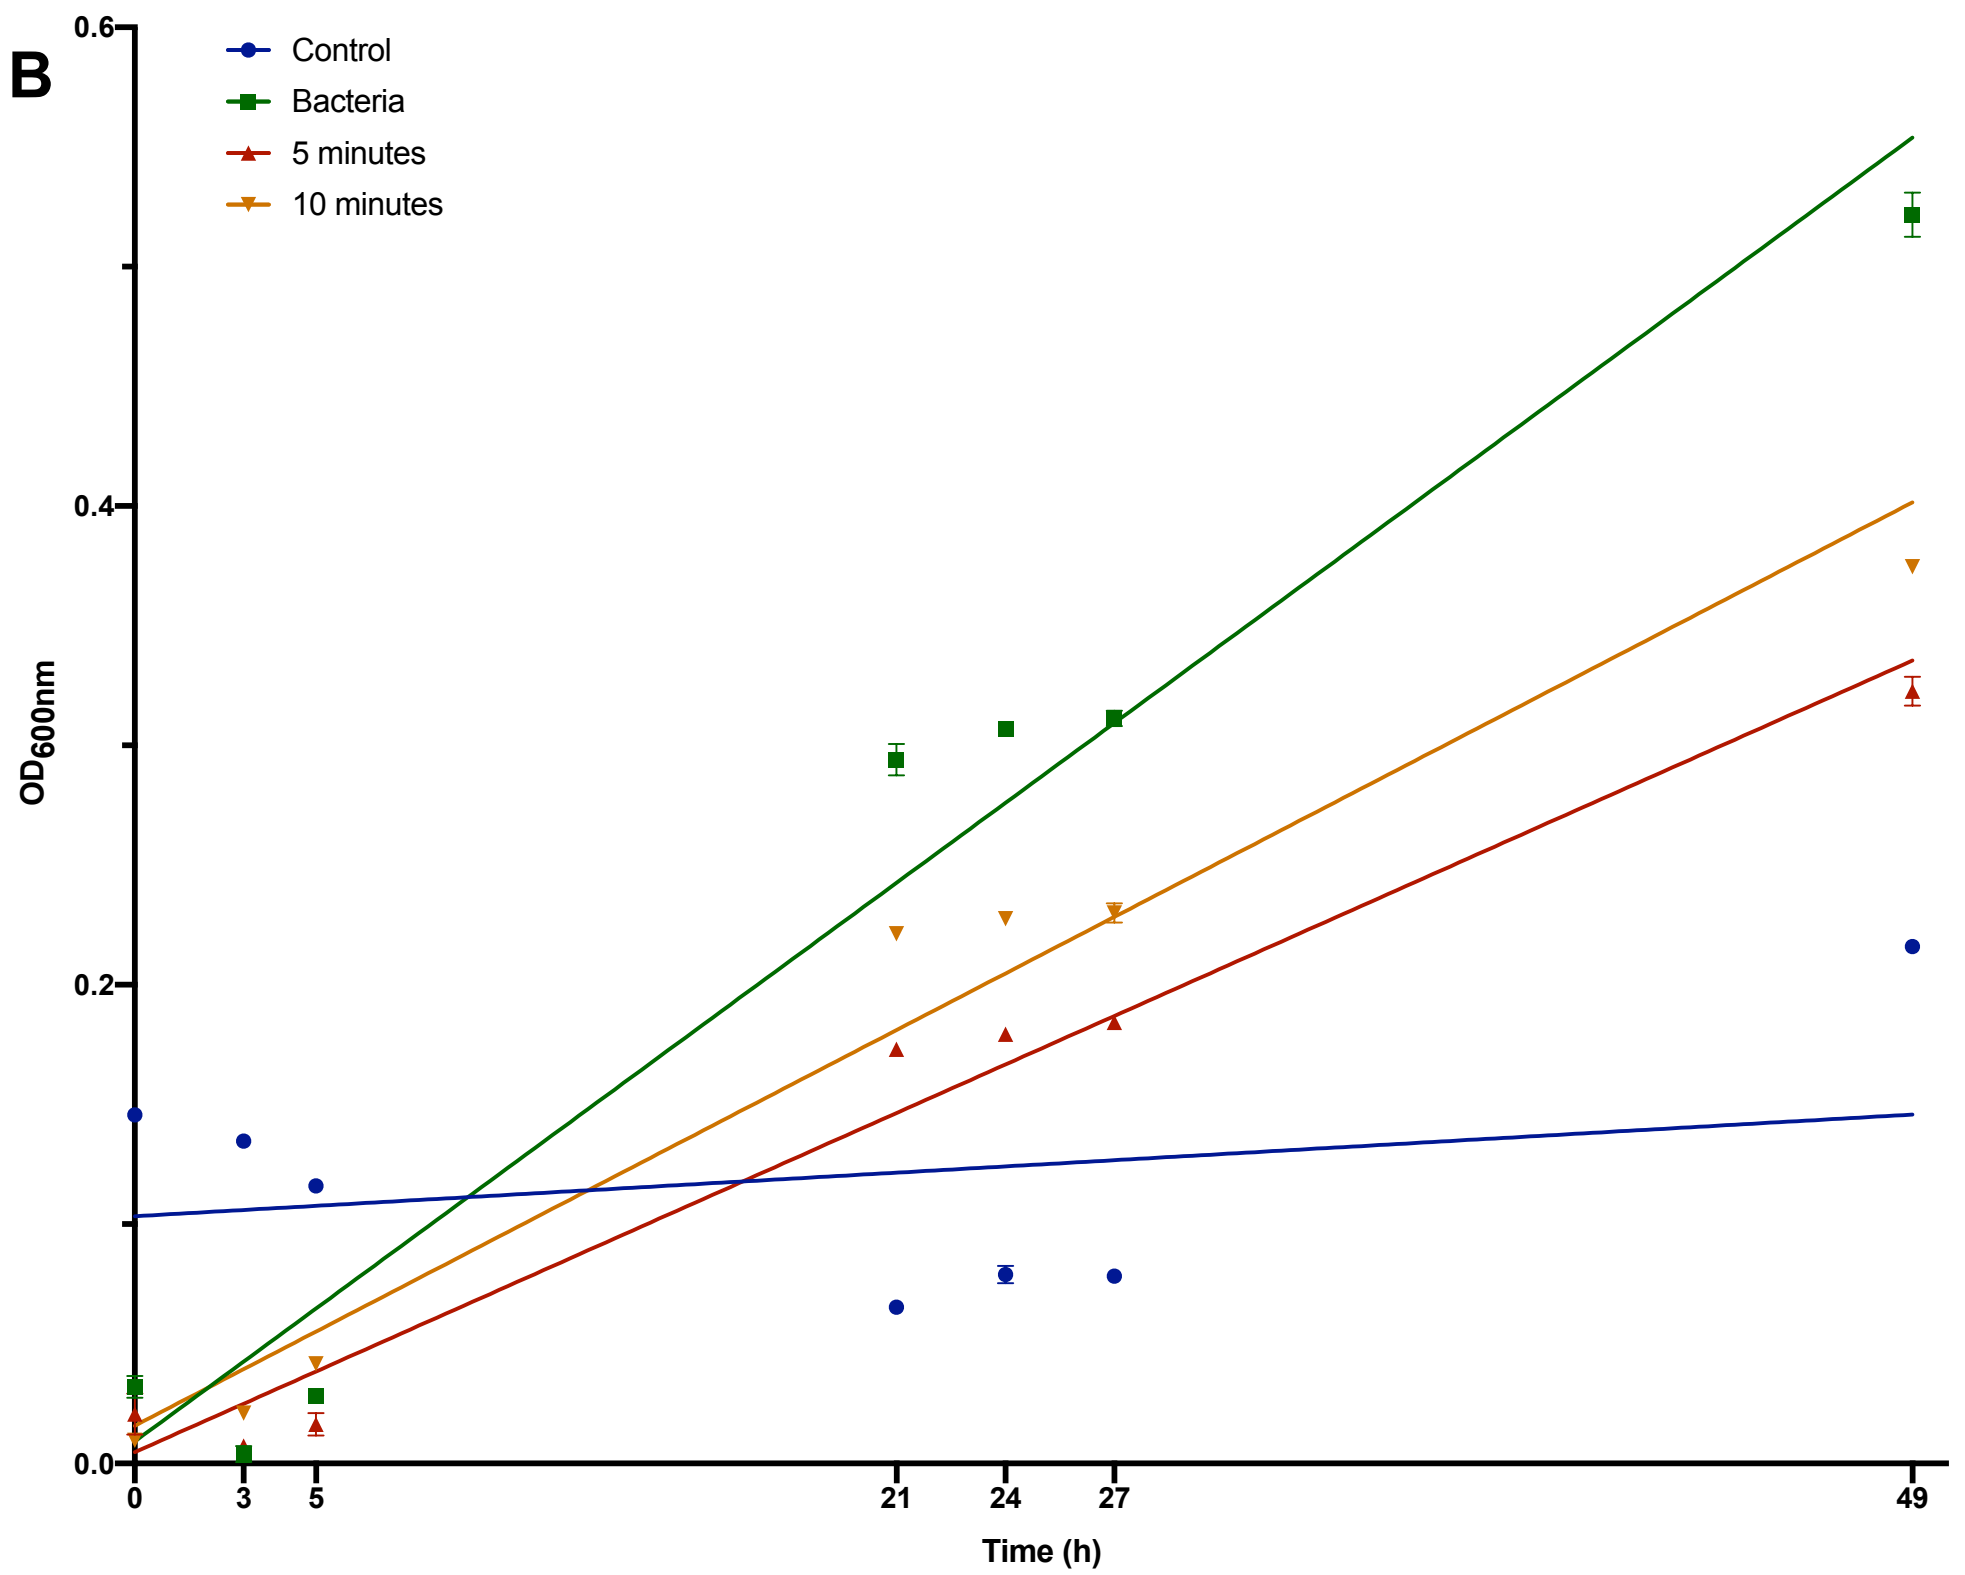

**C**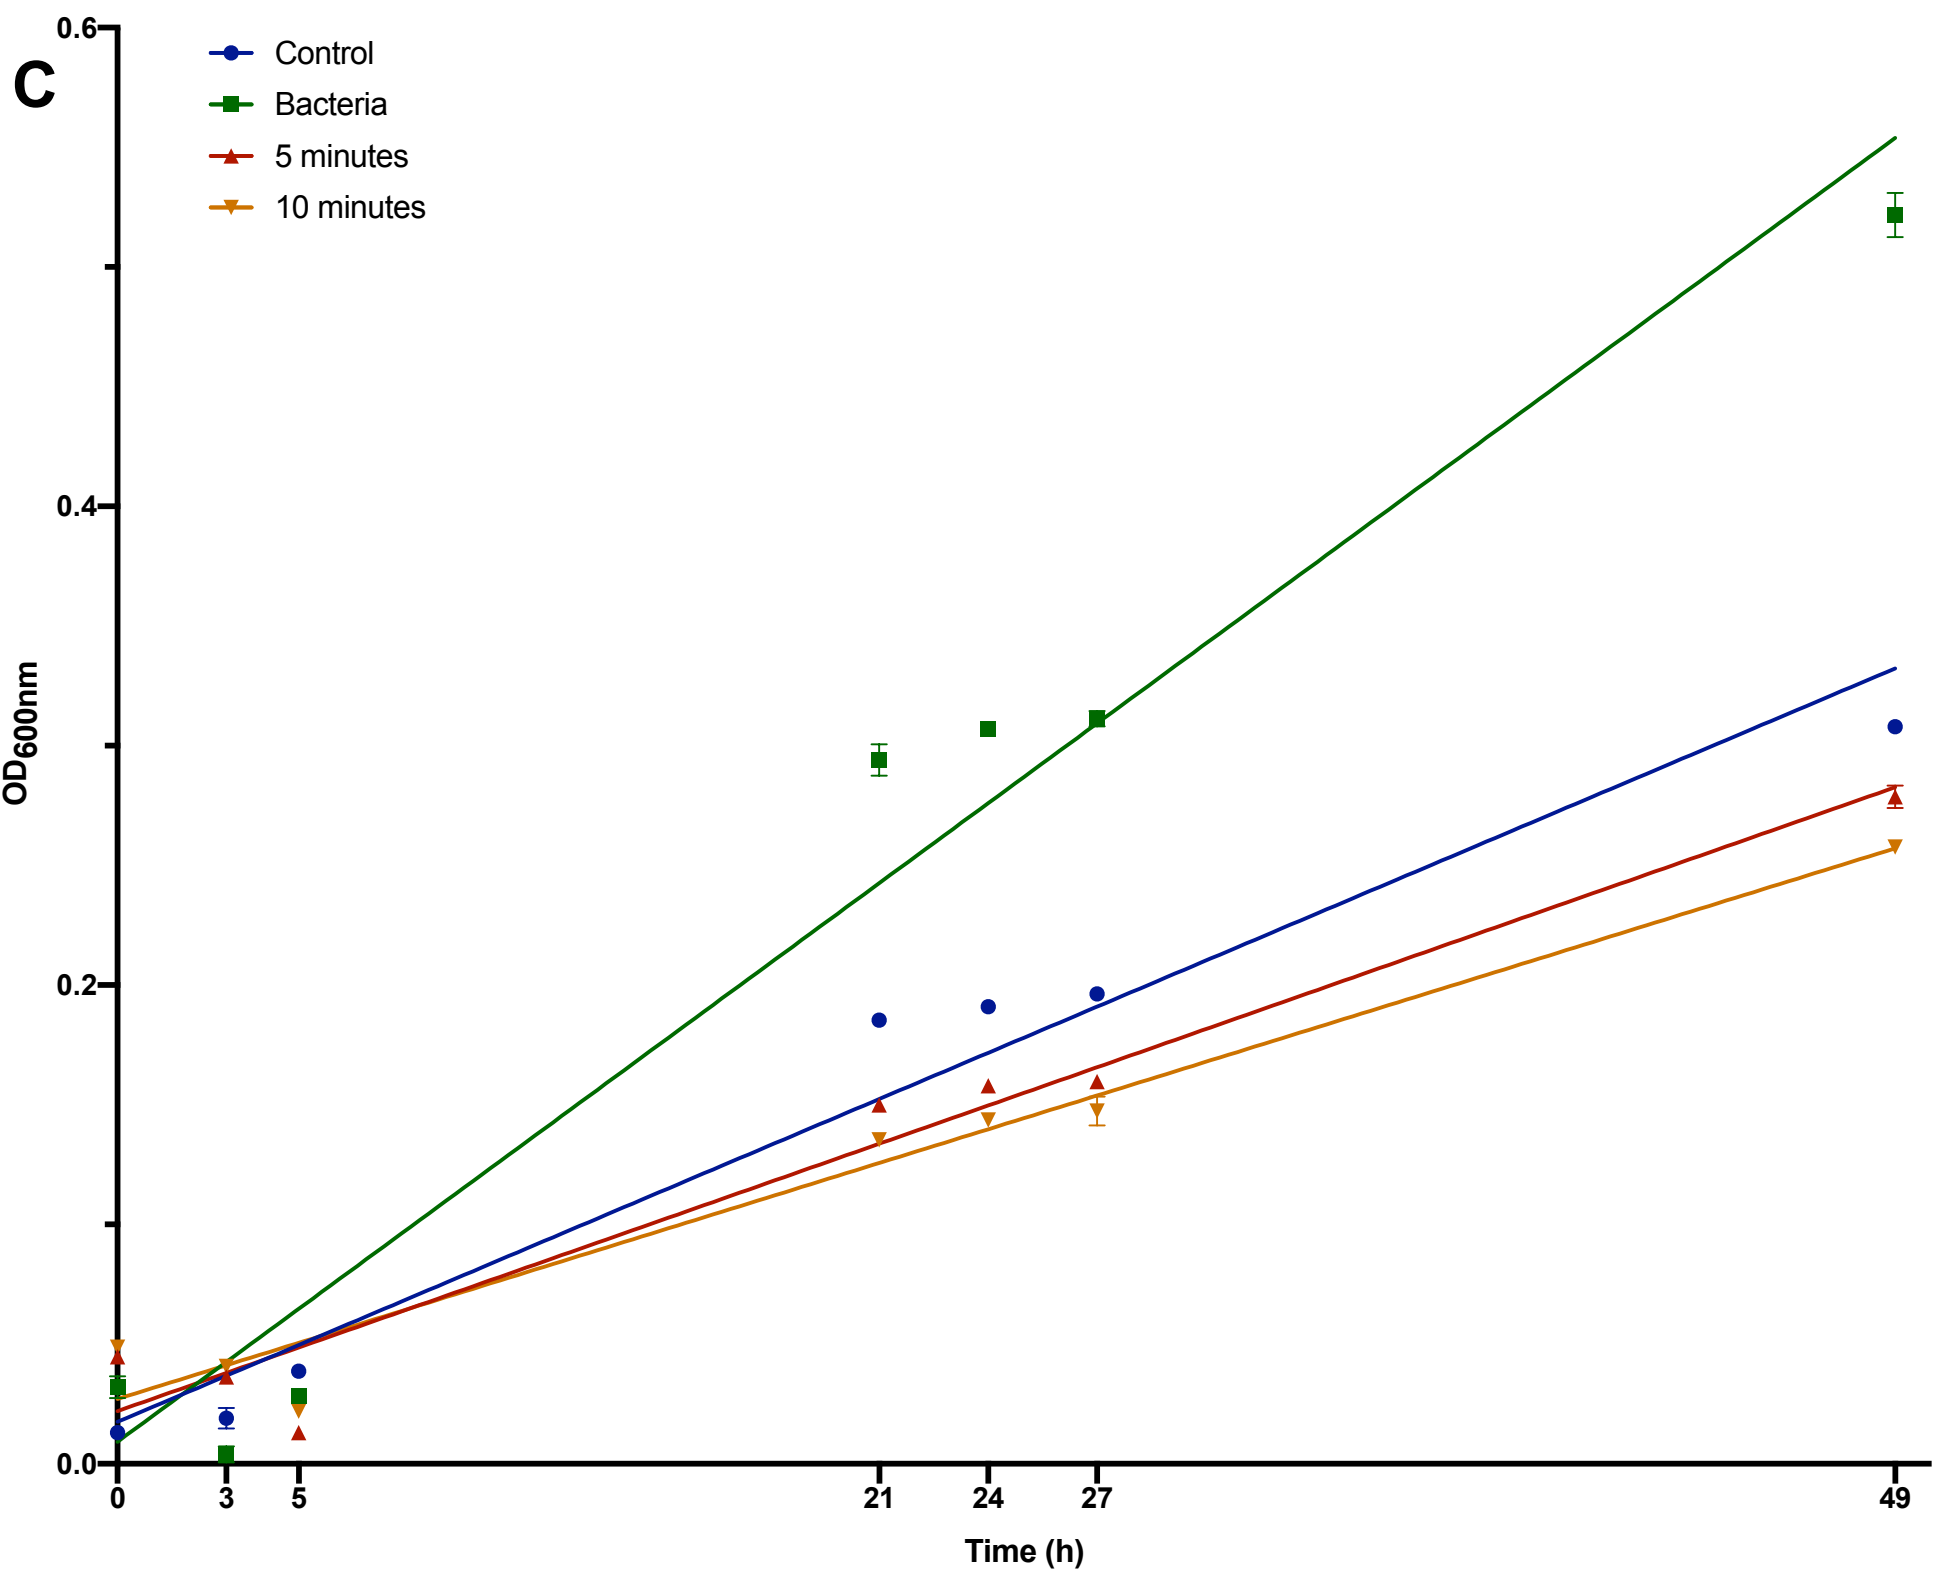

**D**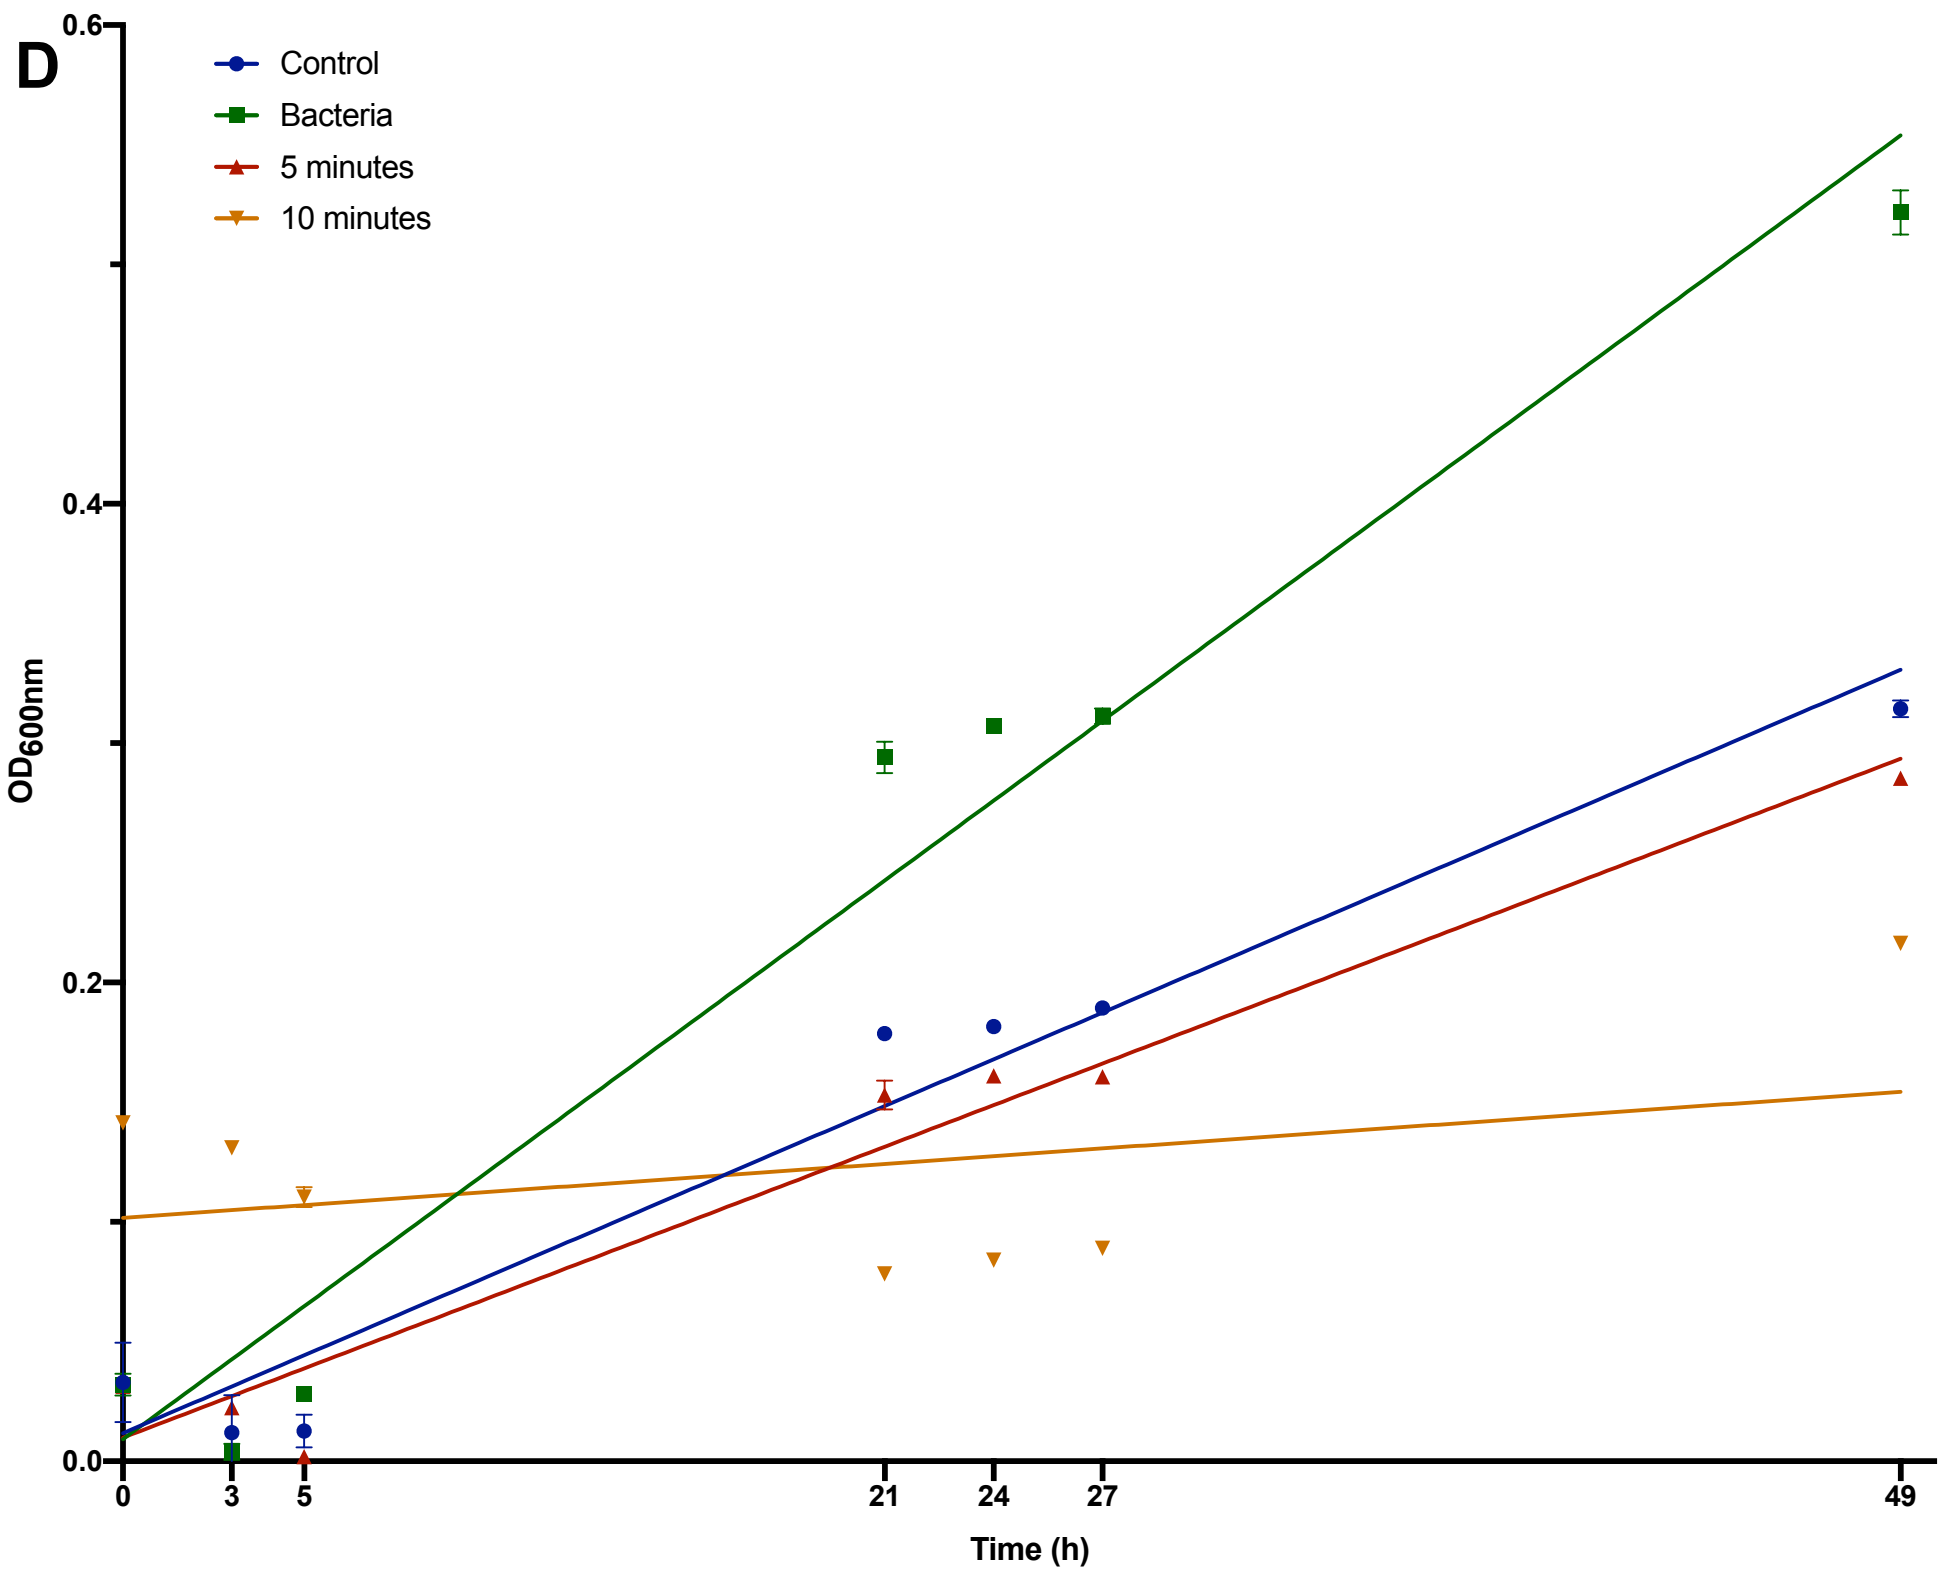

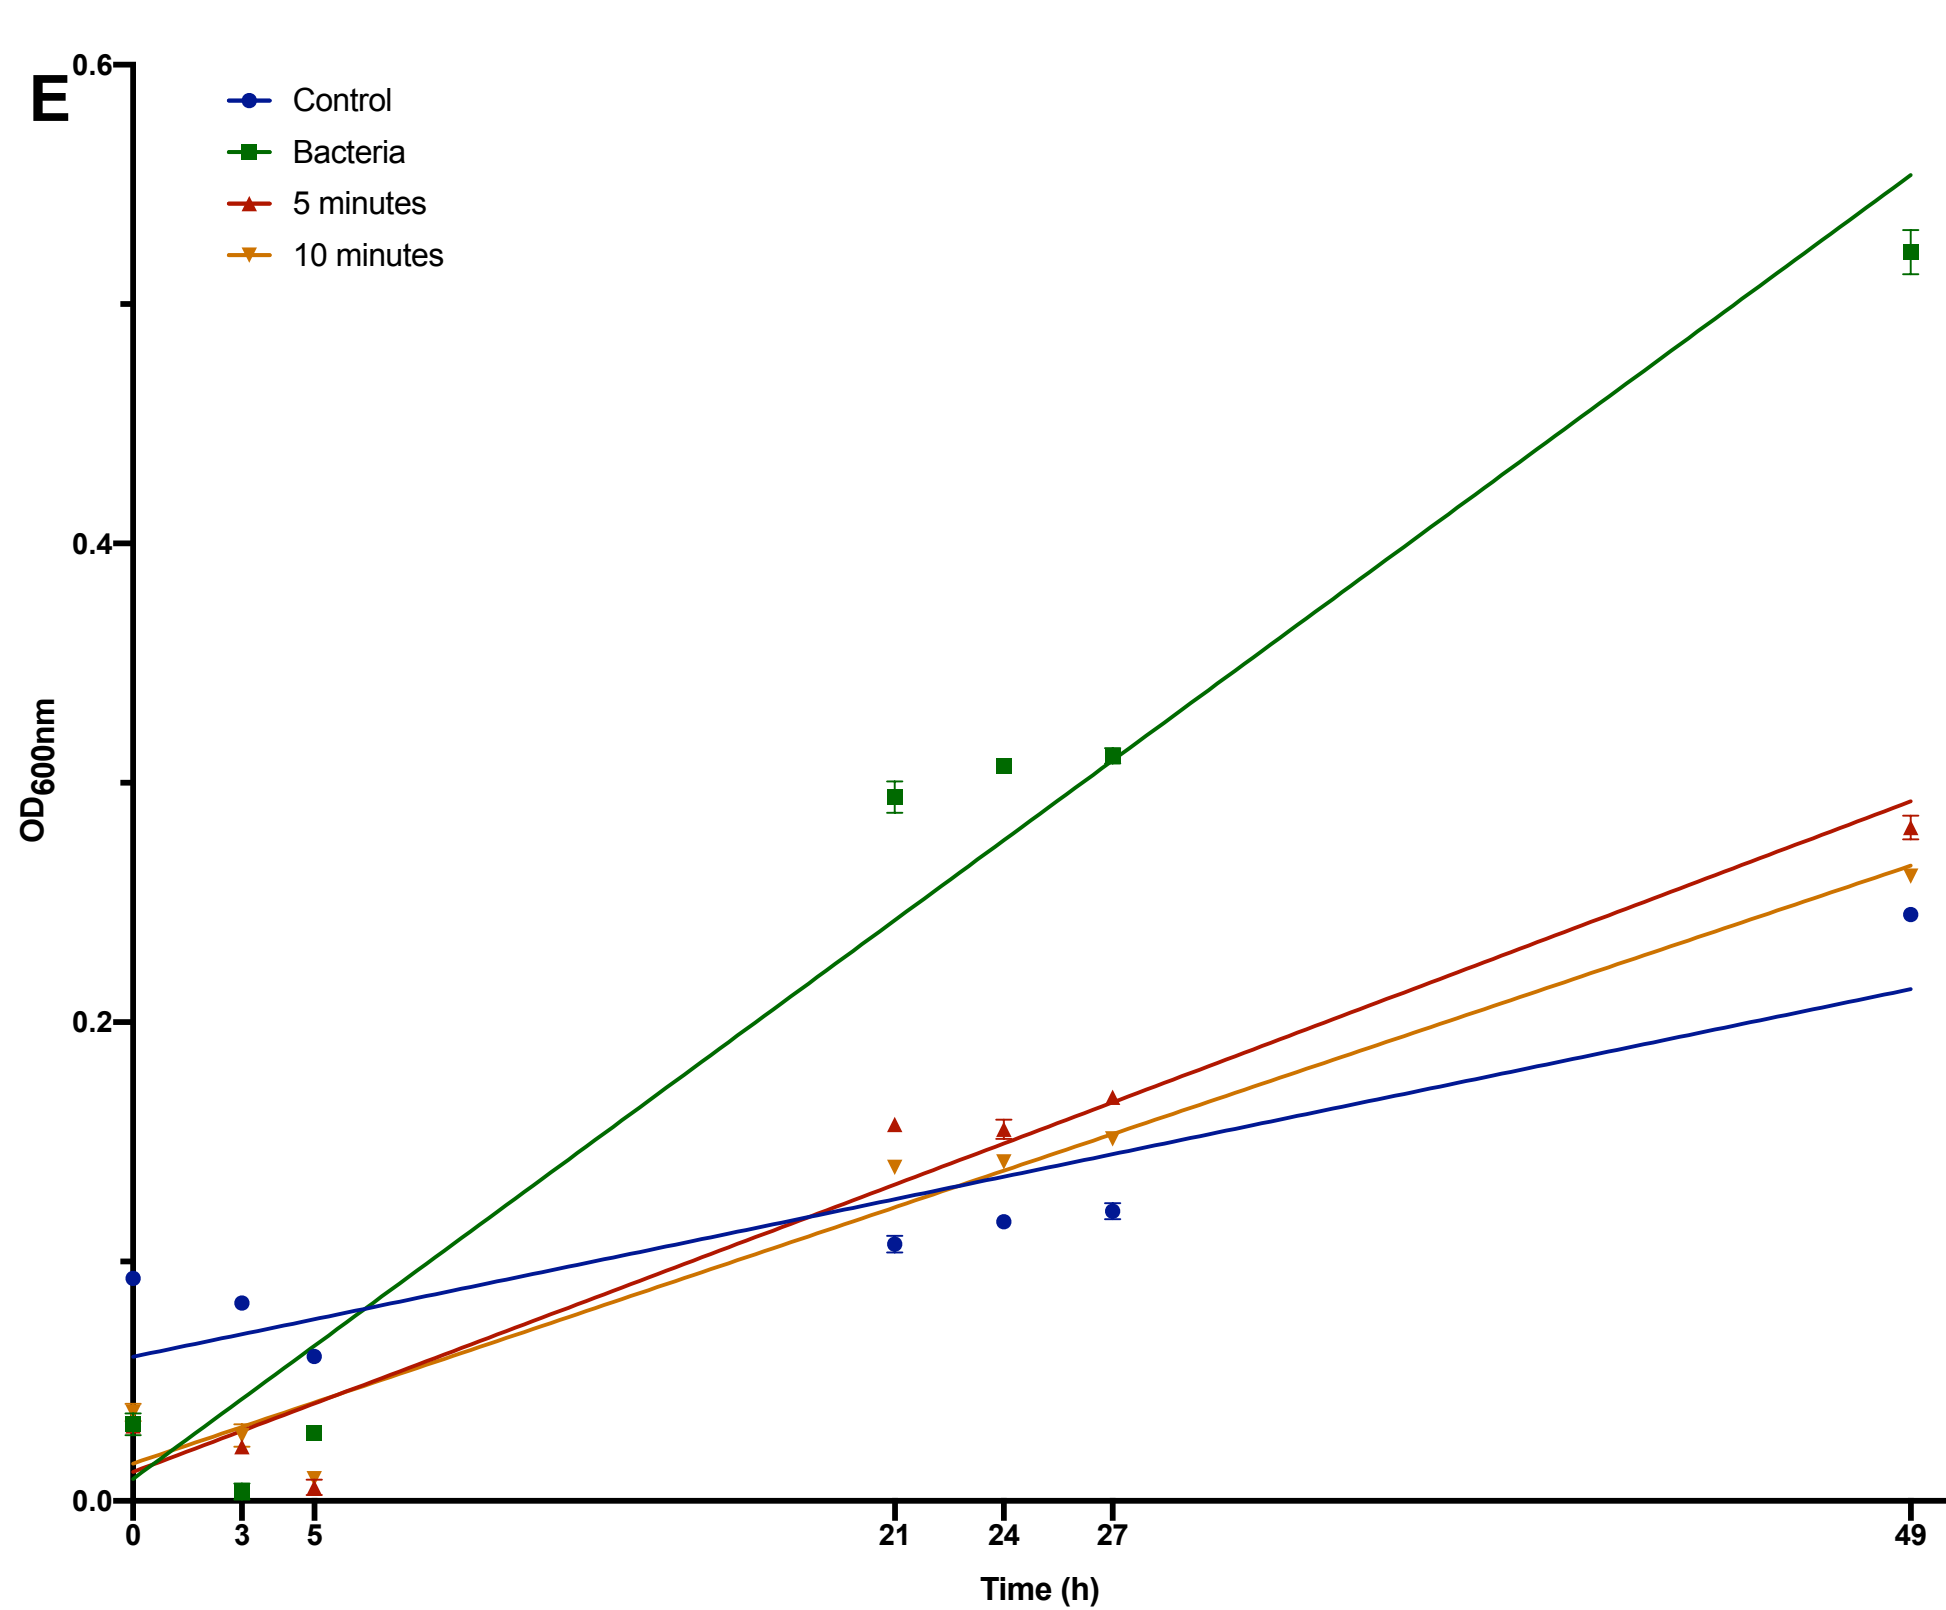

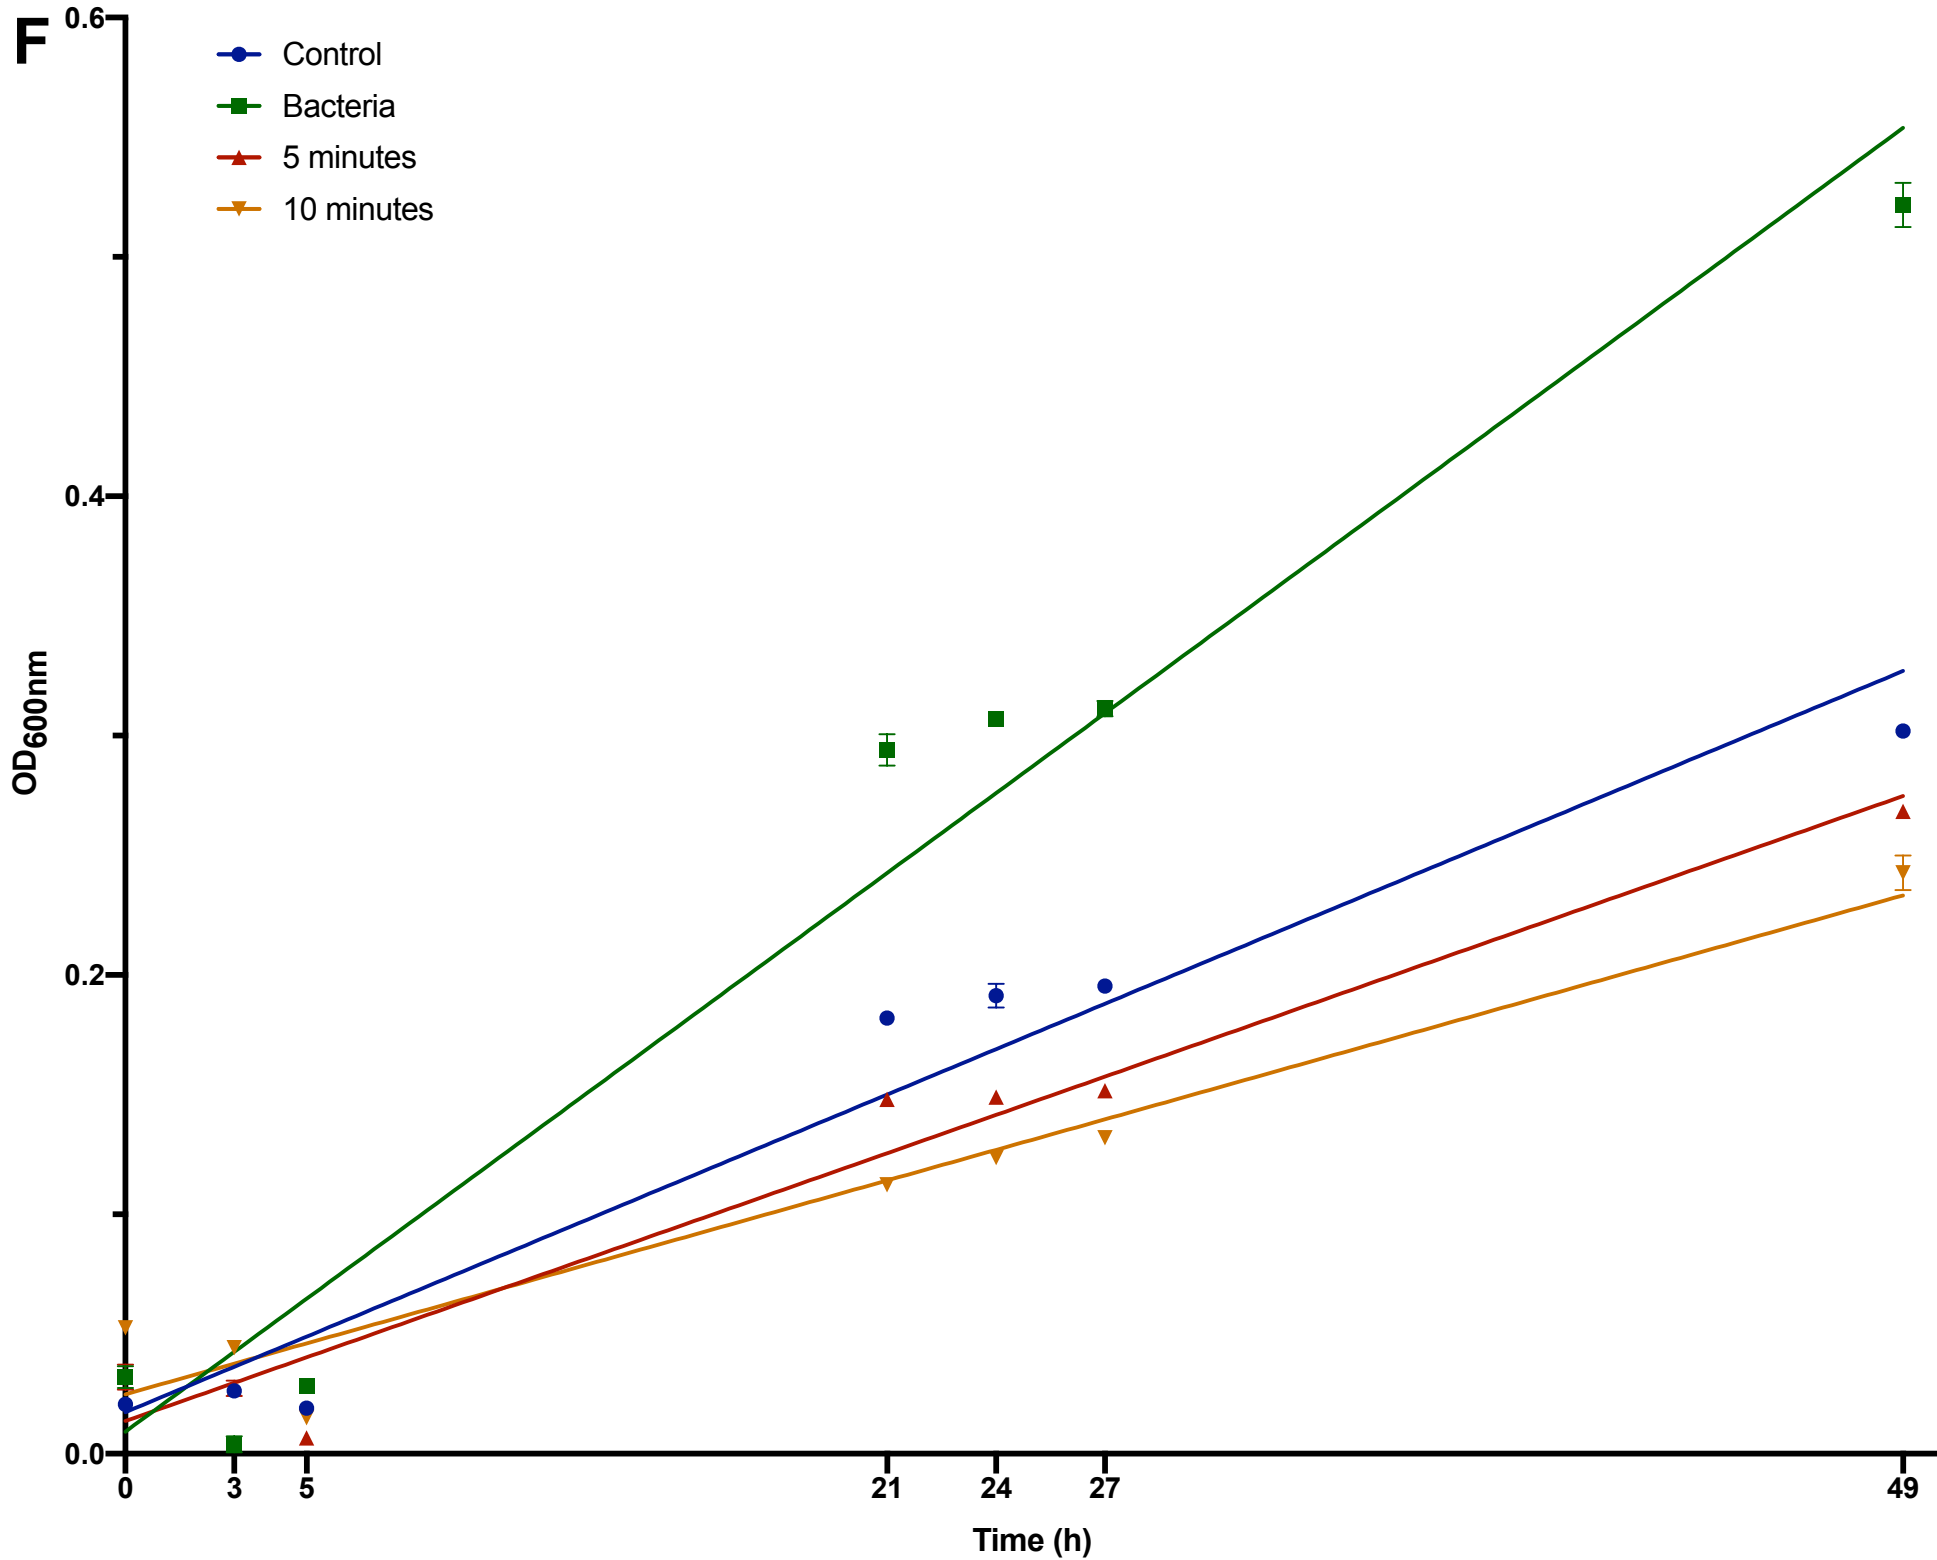

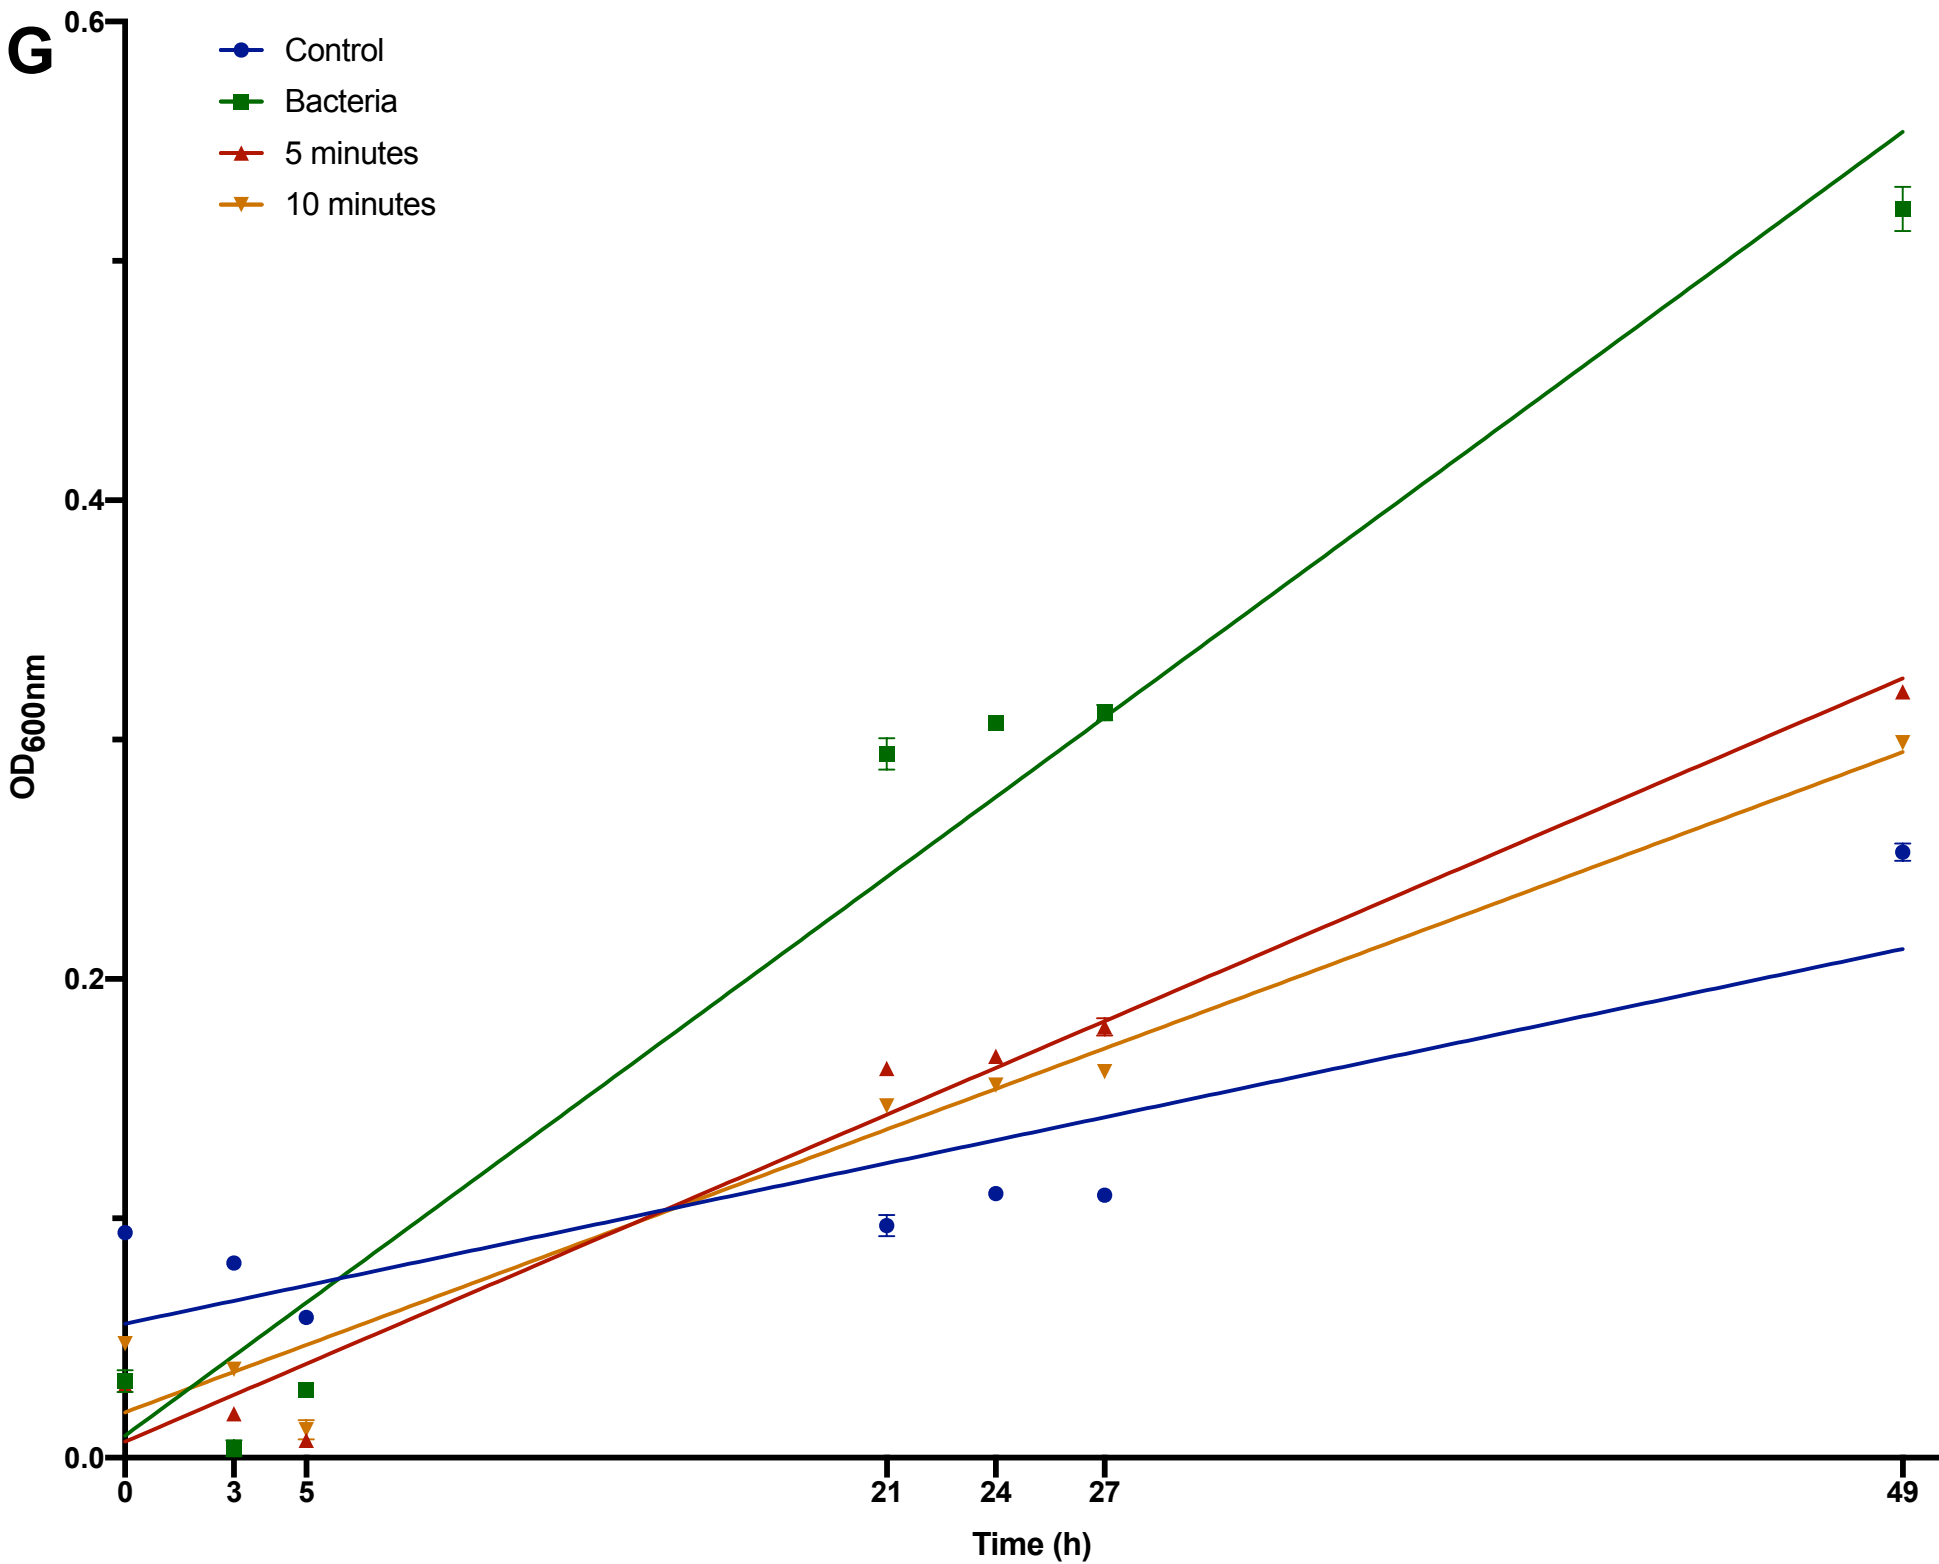

Supplement: pone.0230842.s005.pdf [file pone.0230842.s005.pdf]
